# Supplementary material for: One-step synthesis of hierarchical Ni–Fe–Al layered double hydroxide with excellent sensing properties for NOx at room temperature
Source: Royal Society of Chemistry journal article supplement (doi:10.1039/c6ra21645e), 2016-01-01
Supplement: c6ra21645e1.pdf [file c6ra21645e1.pdf]

## Supporting Information

### **One-step synthesis of hierarchical Ni-Fe-Al layered double hydroxide with excellent sensing properties for NO<sub>x</sub> at room temperature**

Dahai Hong<sup>a</sup>, Jiawei Zhang<sup>b</sup>, Afrasiab Ur Rehman<sup>a</sup>, Lihong Gong<sup>c</sup>, Jiao Zhou<sup>a</sup>, Kan Kan<sup>a</sup>, Li li<sup>a,b\*</sup>, Keying Shi<sup>a, c\*</sup>

<sup>a</sup> *Key Laboratory of Functional Inorganic Material Chemistry, School of Chemistry and Material Science, Heilongjiang University, Harbin, 150080, P. R. China.*

<sup>b</sup> *Key Laboratory of Chemical Engineering Process & Technology for High-efficiency Conversion, School of Chemistry and Material Science, Heilongjiang University, Harbin 150080, P. R. China.*

<sup>c</sup> *Key Laboratory for Photonic and Electronic, Ministry of Education. Modern experiment center, Harbin Normal University, Harbin 150025, P. R. China.*

Corresponding author. Tel.: +86 451 86609141; +86 451 86604920

E-mail: llwjhlju@sina.cn, shikeying2008@163.com

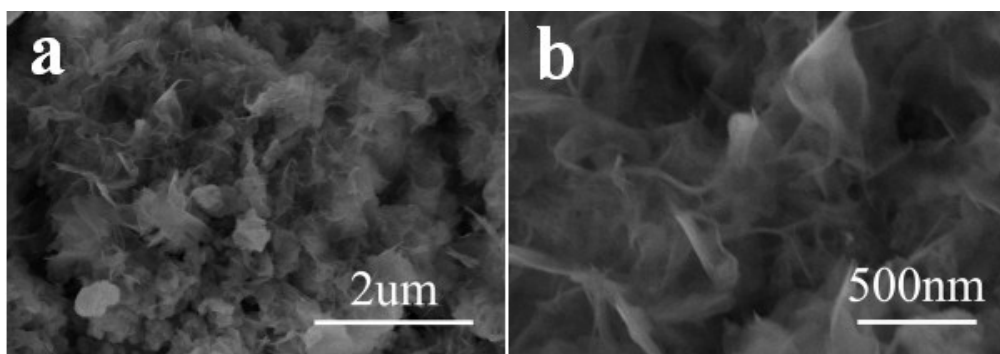

Fig. S1. (a, b) TEM images of pure NA-LDHs.

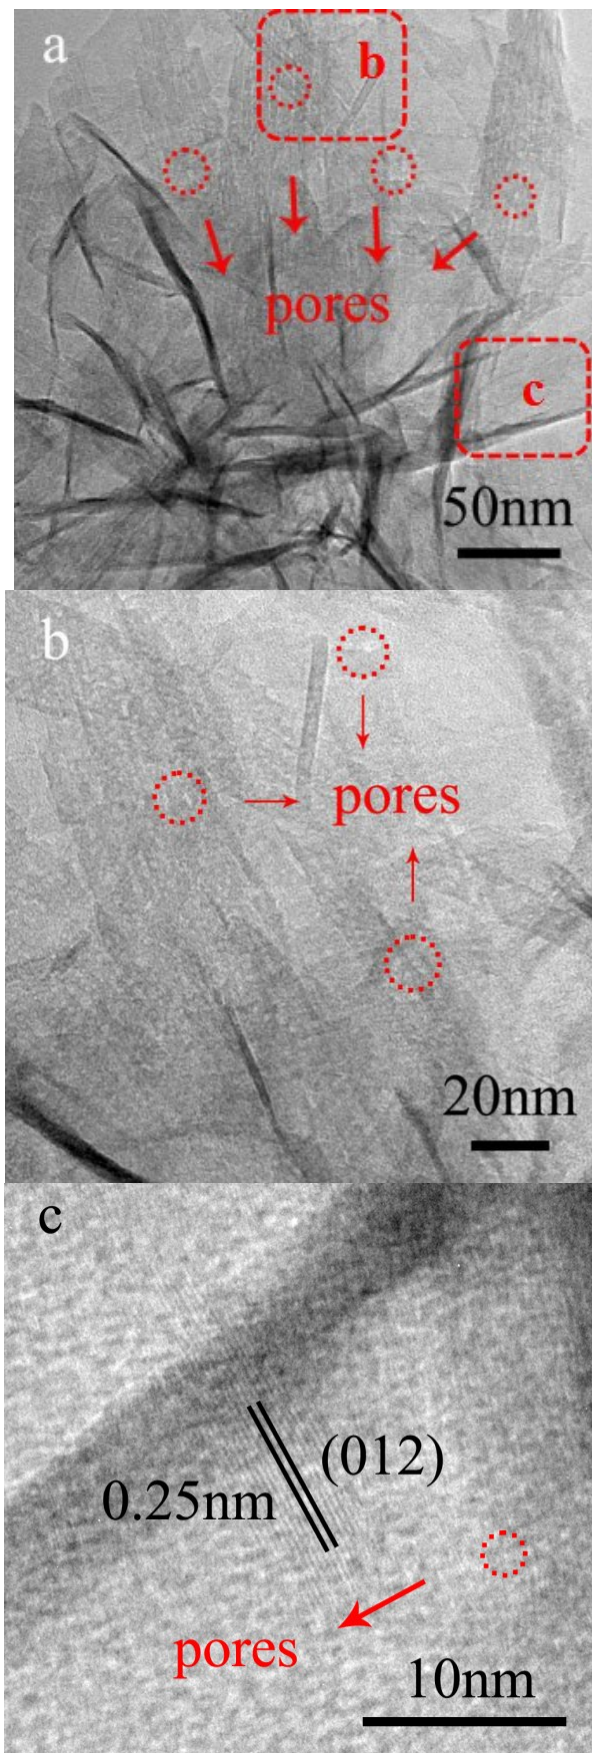

Fig. S2 TEM images of NFA 1-1

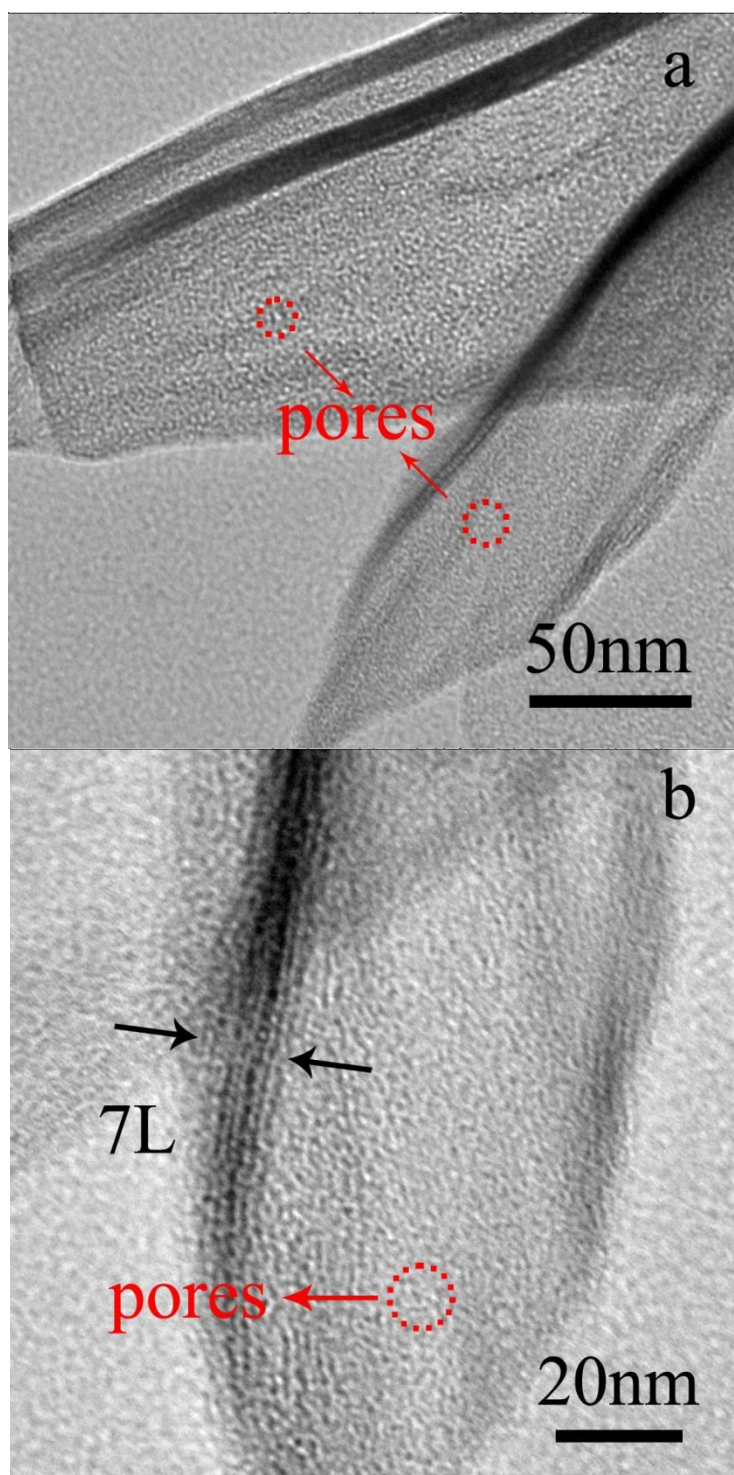

Fig. S3 (a, b) TEM images of NFA 1-1

(High magnification TEM of Fig. 3A : see blue box)

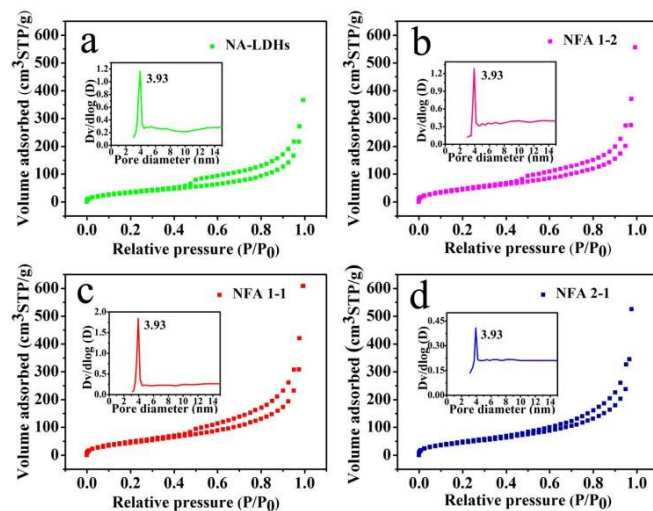

Fig. S4 a,b,c and d is Nitrogen adsorption-desorption isotherms and pore size distribution curve of NA-LDHs NFA 1-2 NFA 1-1 and NFA 2-1 respectively.

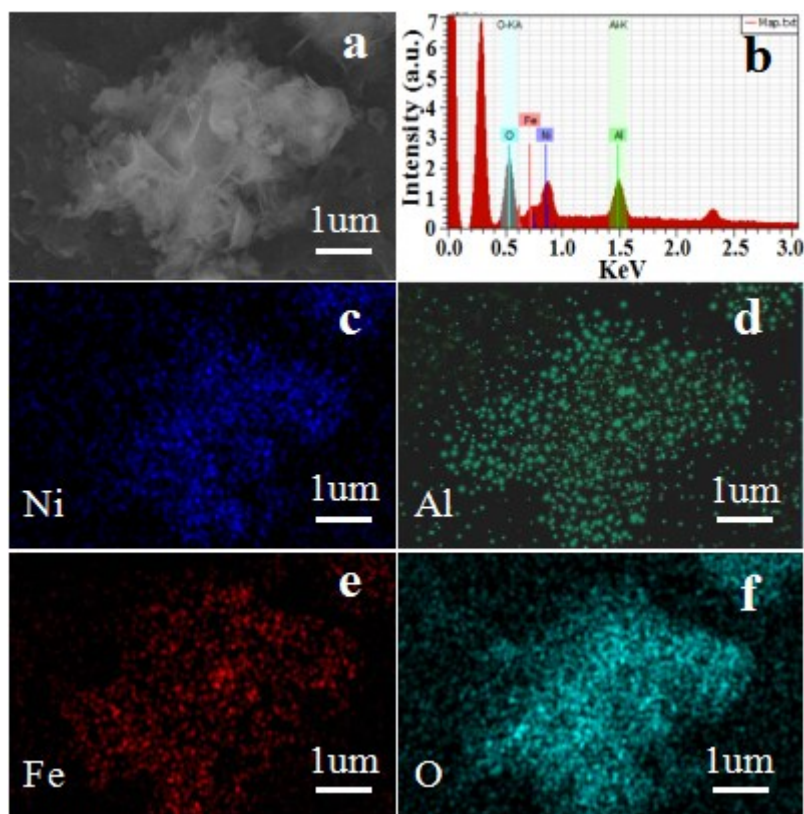

Fig. S5 STEM image/EDS mapping of NFA 1-1 sample. (a) bright field image, (b) EDS spectra, (c, d, e, f) corresponding to Ni, Al, Fe and O elemental mapping, respectively.

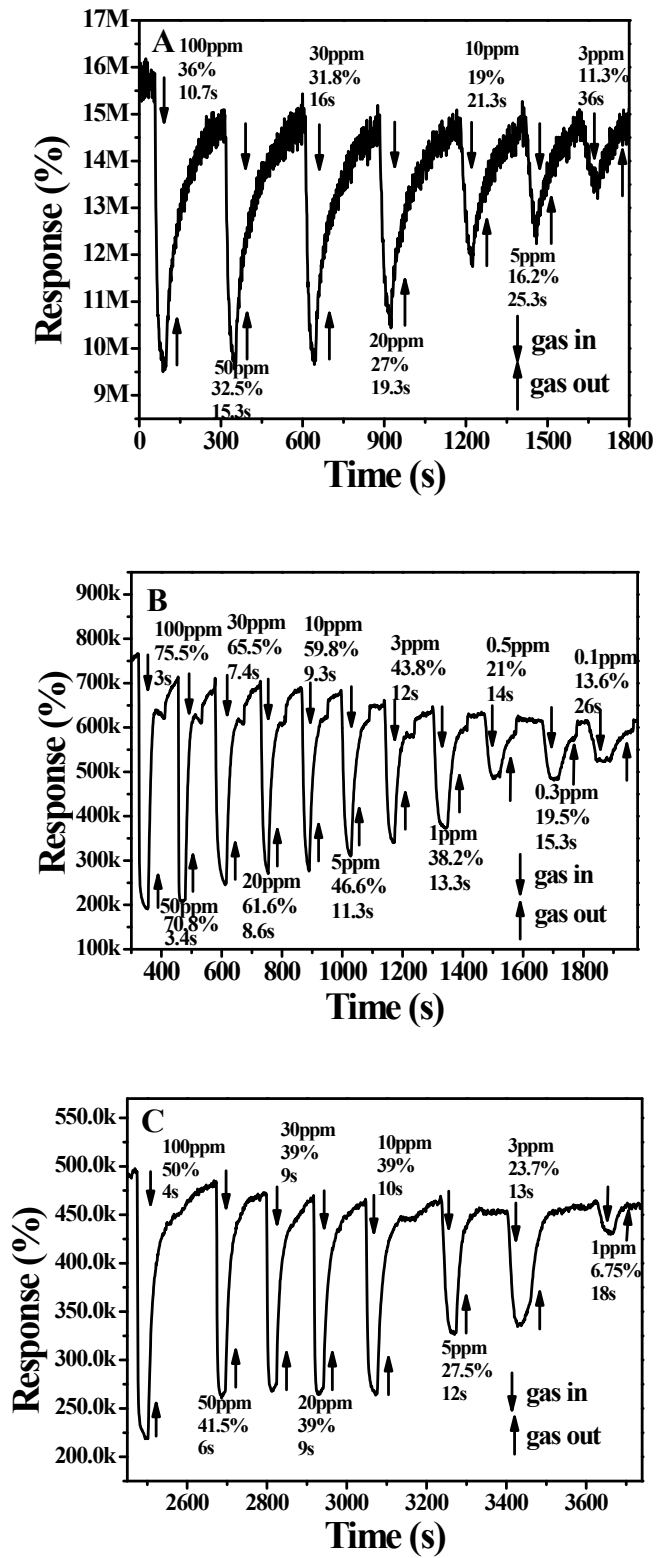

Fig. S6 Dynamic response curves of sensors to 0.1-100 ppm NO<sub>x</sub> at room temperature in air. (A) NA-LDHs. (B) NFA 1-2 and (C) NFA 2-1

Table S1. Sensitivity results of NFA 1-1 sensor to NO<sub>x</sub> at room temperature in air

|                 | 100 | 50   | 30   | 20   | 10  | 5    | 3    | 1    | 0.5  | 0.3  | 0.1  |
|-----------------|-----|------|------|------|-----|------|------|------|------|------|------|
|                 | ppm | ppm  | ppm  | ppm  | ppm | ppm  | ppm  | ppm  | ppm  | ppm  | ppm  |
| Sensitivity (%) | 82  | 71.3 | 69.5 | 65.5 | 62  | 55.1 | 46.4 | 43.4 | 28.2 | 26.3 | 18   |
| Time (s)        | 2.6 | 3.3  | 7.3  | 8    | 9   | 10   | 11.3 | 12.6 | 14.6 | 15.3 | 19.3 |

Table S2. Fitted impedance parameters of samples

| Samples | $R_{\Omega}$ ( $\Omega$ ) | $C$ ( F cm <sup>-2</sup> ) | $R_{ct}$ ( $\Omega$ ) |
|---------|---------------------------|----------------------------|-----------------------|
| NA-LDHs | 64.84                     | $4.37 \times 10^{-6}$      | 5769                  |
| NFA 1-2 | 62.87                     | $3.041 \times 10^{-6}$     | 925.4                 |
| NFA 1-1 | 60.91                     | $1.939 \times 10^{-6}$     | 329.2                 |
| NFA 2-1 | 71.36                     | $3.242 \times 10^{-6}$     | 1618                  |

Here,  $R_{\Omega}$  indicates the uncompensated bulk resistance of the electrolyte, separator and electrode, where  $R_{ct}$  is attributed to the charge-transfer resistance at the active material interface and  $C$  is the constant phase angle element, involving double layer capacitance.
